# Supplementary material for: Endosomal chemokine receptor signalosomes regulate central mechanisms underlying cell migration
Source: eLife journal article supplement (doi:10.7554/elife.99373), 2024-08-14
Supplement: fig4-data1 [file elife-99373-fig4-data1-v1.pdf]

# HEK293-CCR7-APEX2

**B**

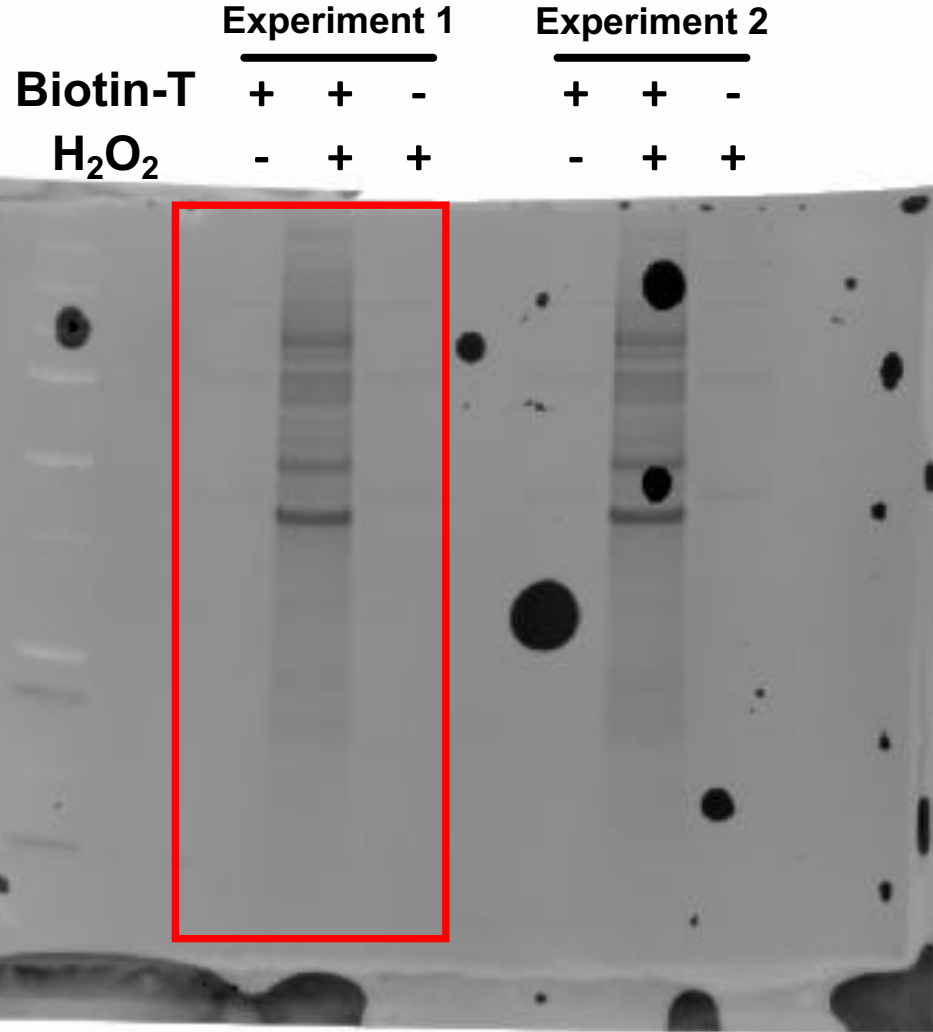

WB: Streptavidin-Alexa488  
Marker: Precision Plus Protein Dual Color Standards (Bio-Rad)

**C**

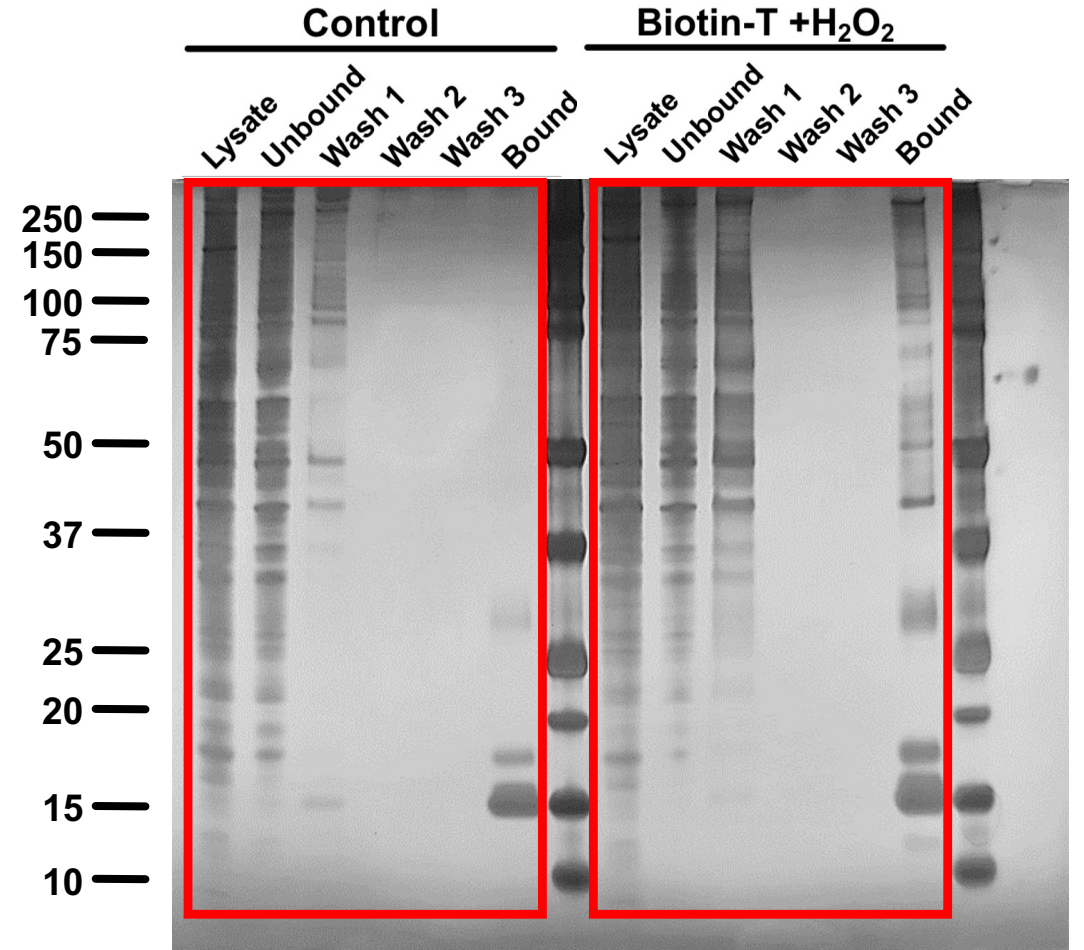

Silver stain  
Marker: Precision Plus Protein Dual Color Standards (Bio-Rad)
