# Supplementary material for: Endosomal chemokine receptor signalosomes regulate central mechanisms underlying cell migration
Source: eLife journal article supplement (doi:10.7554/elife.99373), 2024-08-14
Supplement: fig5-figsupp2-data1 [file elife-99373-fig5-figsupp2-data1-v1.pdf]

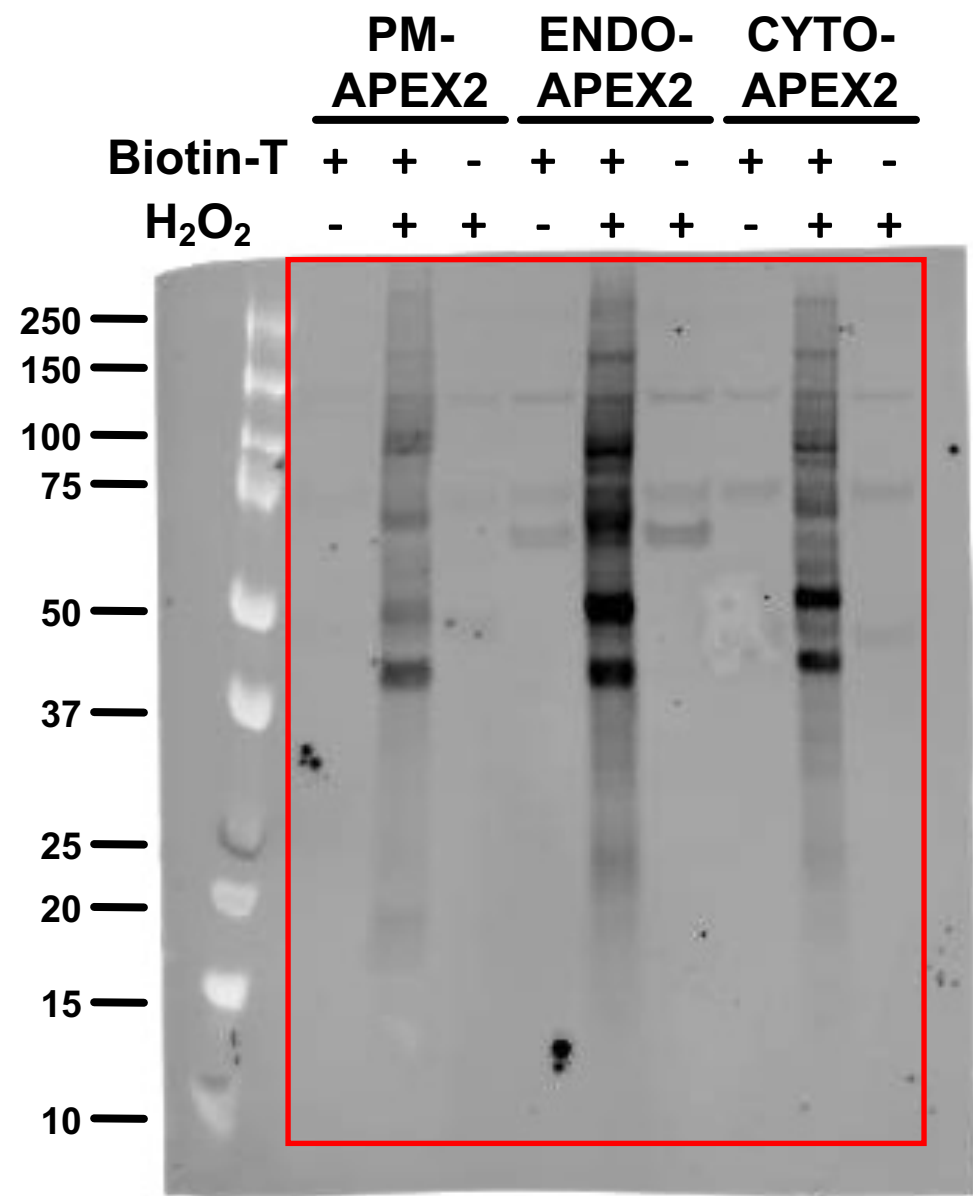

WB: Streptavidin-Alexa488  
 Marker: Precision Plus Protein Dual Color Standards (Bio-Rad)
