# Supplementary material for: Endosomal chemokine receptor signalosomes regulate central mechanisms underlying cell migration
Source: eLife journal article supplement (doi:10.7554/elife.99373), 2024-08-14
Supplement: fig6-figsupp1-data1 [file elife-99373-fig6-figsupp1-data1-v1.pdf]

# HEK293-CCR7 cells transfected with either pcDNA3.1 (-) or HA-Dynamin1-K44A (K44A)

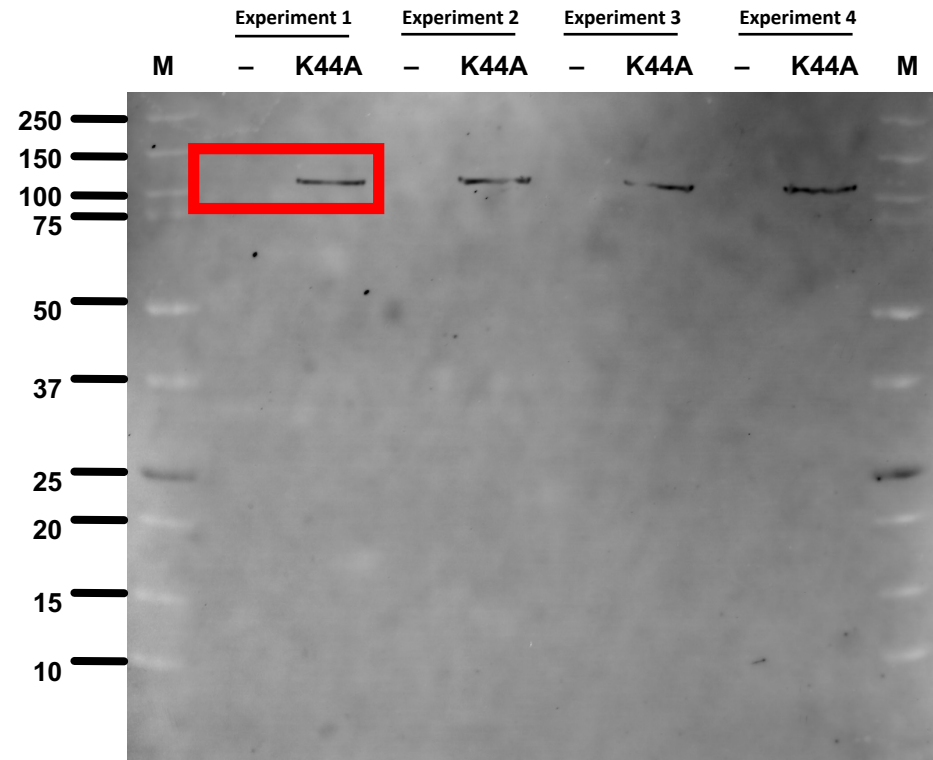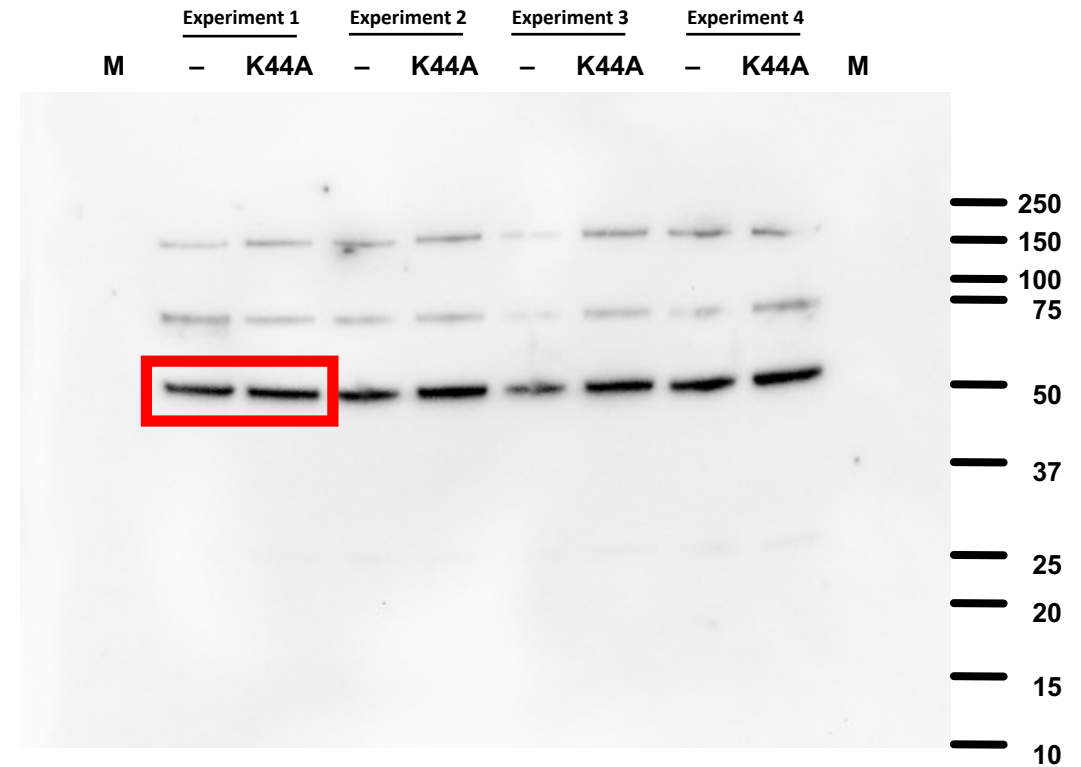

WB: Anti-HA (left) and anti- $\beta$ -tubulin (right)  
Marker: Precision Plus Protein Dual Color Standards (Bio-Rad)
